# Supplementary material for: CRKL mediates EML4-ALK signaling and is a potential therapeutic target for ALK-rearranged lung adenocarcinoma
Source: PubMed Central journal article supplement (PMC5045389; doi:10.18632/oncotarget.8638), 2016-04-07
Supplement: oncotarget-07-29199-s002.pdf [file oncotarget-07-29199-s002.pdf]

| Sequence                                 | Protein Accessions      | 2228D/C      | 2228D/N      | 3122D/C     | 3122D/N      |
|------------------------------------------|-------------------------|--------------|--------------|-------------|--------------|
| MQQNGyENPTYK                             | A4_HUMAN                |              |              |             |              |
| LMTGDTyTAHAGAK                           | ABL1_HUMAN              | 1.769647019  | 1.873190443  |             |              |
| TKPSDEEMLFlyGHYK                         | ACBP_HUMAN              | -10.34603215 | 0            |             |              |
| KPTyDPVSEDQDPLSSDFKR                     | ACK1_HUMAN              | 1.033190098  | 0.424137546  | 0.097456646 | 0.159060475  |
| IWHHTFyNELR                              | ACTB_HUMAN              | 0            | -6.97440785  |             |              |
| TTGIVMDSGDGVTHTVPIyEGYALPHAILR-19        | ACTB_HUMAN              | 0            | -4.939226725 | 0           | -8.09155708  |
| TTGIVMDSGDGVTHTVPIYEGyALPHAILR-22        | ACTB_HUMAN              |              |              | 0           | -8.09155708  |
| DSyVGDEAQSK                              | ACTB_HUMAN              | 1.376656283  | 0.259204352  |             |              |
| GySFTTTAER                               | ACTB_HUMAN              | 0.053972798  | -0.990467606 |             |              |
| AIMTYVSSFyHAFSGAQK                       | ACTN1_HUMAN;ACTN4_HUMAN | -2.678952579 | 4.579097631  |             |              |
| mVDyHAANqSyQyGPSSAGNGAGGGGSMGDYMAQEDDWDR | ACTN4_HUMAN             |              |              | 6.846050555 | 6.846050555  |
| FAVPTyAAK                                | ADAM9_HUMAN             | 0.740107603  | 1.076140299  |             |              |
| VSSQGNLIPARPAPAPPLYSSLT                  | ADAM9_HUMAN             | 0.48432629   | 9.095593015  |             |              |
| VAQQPLSLVGcEVVPDPSDHLySFR                | AF1L2_HUMAN             | -8.496974779 | -8.638194423 | 0           | -8.763457316 |
| AGLQTADKyAALANLDNIFSAAGQGGDQSGFGTTGK     | AGFG1_HUMAN             | 0            | -5.595511073 |             |              |
| VKGEyDMTVPK                              | AHNK_HUMAN              | 0.694455386  | 2.148460798  |             |              |
| VKGEyDVTVPK                              | AHNK_HUMAN              | -0.123519273 | 0.401940077  |             |              |
| GNVVKGEyDVTMPK                           | AHNK_HUMAN              | 1.482713302  | 7.428574533  |             |              |
| MKGDyDVTVPK                              | AHNK_HUMAN              | 0.587932545  | 2.097752678  |             |              |
| VTAYTVDVTGR                              | AHNK_HUMAN              | 0            | -4.586789602 |             |              |
| LNDGHFMPVLGFGTyAPAEVPK                   | AK1C1_HUMAN;AK1C2_HUMAN | 0.744368868  | -0.605223231 |             |              |
| HIDSAHLyNNEEQVGLAIR                      | AK1C1_HUMAN;AK1C3_HUMAN | -7.394969431 | -8.74825075  |             |              |
| LNDGHFMPVLGFGTyAPPEVPR                   | AK1C3_HUMAN             | 0            | -6.986669249 |             |              |
| NLHYFNDSDFASHPNYPYSDEy                   | AK1C3_HUMAN             | -7.966375632 | 0            |             |              |
| PyQYPALTPEQK                             | ALDOA_HUMAN             | -5.608461045 | -5.950487392 |             |              |
| NKPTSLWNPTyGSWFTEKPTK                    | ALK_HUMAN               | 3.736755446  | 2.232889108  | 1.707838406 | 2.449508588  |
| NKPTSLWNPTyGSWFTEKPTK                    | ALK_HUMAN               | 2.77551749   | 1.379935298  | 0.996941348 | 1.759910505  |
| TSTIMTDYNPNYcFAGK-12                     | ALK_HUMAN               | 10.80946452  | 10.80946452  | 2.521014343 | 2.95567563   |
| TSTIMTDyNPNYcFAGK-8                      | ALK_HUMAN               |              |              | 2.521014343 | 2.95567563   |
| HQELQAMQMELQSPEyK                        | ALK_HUMAN               | 9.718207375  | 9.718207375  | 8.895450456 | 8.895450456  |
| KHQELQAMQMELQSPEyK                       | ALK_HUMAN               | 9.331519066  | 9.331519066  | 9.026528314 | 9.026528314  |
| HFPcGnVNYGyQQQGLPLEAATAPGAGHyEDTILK-11   | ALK_HUMAN               |              |              | 9.586576505 | 9.586576505  |
| HFPcGnVNYGYQQQGLPLEAATAPGAGHyEDTILK-9    | ALK_HUMAN               |              |              | 9.586576505 | 9.586576505  |
| HFPcGNVNYGYQQQGLPLEAATAPGAGHyEDTILK-29   | ALK_HUMAN               | 8.580682424  | 8.580682424  |             |              |
| ADIVQQLLQQGASPNAATTSGyTPLHLSAR           | ANK3_HUMAN              |              |              | 7.47315667  | 7.47315667   |
| GGPGSAVSPyPTFNPSSDVAALHK                 | ANXA1_HUMAN             | 0.450806751  | 0.256140966  |             |              |
| ALyEAGER                                 | ANXA1_HUMAN             | 0.072538195  | -0.4480718   |             |              |
| ALyEAGERR                                | ANXA1_HUMAN             | -0.340097601 | -0.934084678 |             |              |
| SLYyYIQDQTK                              | ANXA2_HUMAN             | 0            | -6.450266198 |             |              |
| SYSPyDMLESIRK                            | ANXA2_HUMAN             | -1.252083826 | 0.801281541  |             |              |
| LyDSMK                                   | ANXA2_HUMAN             | 0            | -5.900579922 |             |              |
| AyTNFDAER                                | ANXA2_HUMAN             | 0.801691217  | 0.587830734  | 1.105018587 | 0.77784689   |
| LSLEGDHSTPPSAyGSVK                       | ANXA2_HUMAN             | -0.634967671 | -0.512507984 | 2.84495484  | 1.041056187  |

|                                                |             |              |              |              |              |
|------------------------------------------------|-------------|--------------|--------------|--------------|--------------|
| SYSPyDMLESIR                                   | ANXA2_HUMAN | 0            | -7.320485441 |              |              |
| DLyDAGVKR                                      | ANXA2_HUMAN | -6.44734947  | -6.938119354 |              |              |
| LYDAyELK                                       | ANXA5_HUMAN | -5.474526696 | -6.516033521 |              |              |
| MQNHGyENPTyK-11                                | APLP2_HUMAN | -0.824040716 | 3.386573336  |              |              |
| MQNHGyENPTyK-6                                 | APLP2_HUMAN | -1.178764021 | 4.253635378  |              |              |
| RTEELyLSQK                                     | ARHG5_HUMAN | -1.510075274 | -1.713474721 | -0.189472809 | -0.453089379 |
| PLyEGLGSGGEK                                   | ARP10_HUMAN | -6.330630775 | -5.769738882 |              |              |
| GIVyTGDR                                       | AT1A1_HUMAN | -8.961739578 | -7.489772061 | 0.586281652  | 0.349152497  |
| DKyEPAAVSEQGDKK                                | AT1A1_HUMAN | -6.560073795 | -6.694459854 |              |              |
| LSyRHGLLGVDK                                   | ATG2B_HUMAN | 6.615851173  | 6.615851173  |              |              |
| AQQGLyQVPGPSPQFQSPPAK                          | BCAR1_HUMAN | 1.235740443  | 1.278253281  | -0.16814911  | -0.091988951 |
| HLLAPGPQDIyDVPPVR                              | BCAR1_HUMAN | -0.236474778 | -1.955606655 | -0.400188881 | 0.177336901  |
| RPGPGTLyDVPR                                   | BCAR1_HUMAN |              |              | 7.917623718  | -0.252615254 |
| VLPPEVADGGVVDGvAvPPPAER                        | BCAR1_HUMAN | 0            | -6.478761607 |              |              |
| LSEAySR                                        | LSEAySR     | LSEyLSEySR   | LSEySR       | LSEySR       | LSEySR       |
| cLEEHyGTSPGQAR                                 | BCAR3_HUMAN | 0            | -5.742534055 |              |              |
| TVMYTAVGSEWRPFyPR                              | BCS1_HUMAN  | -1.251330023 | -1.868427312 |              |              |
| VFDKDGNGyISAAELR                               | CALM_HUMAN  | 0.666333958  | 1.294405531  |              |              |
| YVDSEGHlyTVPIR                                 | CAV1_HUMAN  | 0.567590378  | 1.176201793  |              |              |
| EQGNlyKPNNK                                    | CAV1_HUMAN  | -8.473936908 | 0            |              |              |
| IKPSSANAlYSLAARPLVVPK                          | CBL_HUMAN   | 11.69469795  | 5.726702991  |              |              |
| SLLSHEFQDETDTTEEETLySSKH                       | CBPD_HUMAN  | -7.631379062 | -7.270591144 |              |              |
| TNKGPAVGlyNDNINTEMPR                           | CDCP1_HUMAN |              |              |              |              |
| SPESESEPyTFSHPNNGDVSSK                         | CDCP1_HUMAN | 1.506840039  | 0.759879314  |              |              |
| GPAVGlyNDNINTEMPR                              | CDCP1_HUMAN |              |              |              |              |
| IGEGTyGVVYK-6                                  | CDK1_HUMAN  | 1.319129432  | 0.891555043  | -0.018618868 | -0.326988348 |
| IGEGTyGVVYK-10                                 | CDK1_HUMAN  |              |              | -2.811000004 | -3.119369484 |
| IGEGTyGTVFK                                    | CDK5_HUMAN  | 0.59264303   | 0.515163657  | -8.341233898 | -8.496052372 |
| HVHLENATEyATLR                                 | CK052_HUMAN | 0.469025214  | 1.119328747  |              |              |
| ALEHFTDLyDIKR                                  | CLH1_HUMAN  | 0            | -7.306001419 |              |              |
| HELQANcyEEVKDR                                 | COF1_HUMAN  | 0.615951219  | 10.2412395   |              |              |
| EVyFAER                                        | CRIP1_HUMAN | 0            | -6.055036587 |              |              |
| QEEAEyVR                                       | CRK_HUMAN   | 6.765837039  | 2.279918546  |              |              |
| NSNSyGIPEPAHAYAQPQTTTPLPAVSGSPGAAITPLPSTQNGPVF | CRKL_HUMAN  |              |              | 3.602318091  | 0.401229354  |
| VPcAyDK                                        | CRKL_HUMAN  |              |              |              |              |
| TLyDFPGNDAEDLPFK                               | CRKL_HUMAN  |              |              |              |              |
| NSNSyGIPEPAHAYAQPQTTTPLPAVSGSPGAAITPLPSTQNGPVF | CRKL_HUMAN  | 0.108374036  | 0.148646933  | 0.474049787  | 0.401229354  |
| RVPcAyDK                                       | CRKL_HUMAN  | -9.561175583 | -10.65137113 |              |              |
| NTyNQTALDIVNQFTTSQASR                          | CSK12_HUMAN | 0            | -5.767405931 |              |              |
| LVyDGIR                                        | CTNA1_HUMAN |              |              | 7.106097801  | 7.106097801  |
| NAGNEQDLGIQyK                                  | CTNA1_HUMAN | 0.211652796  | 0.645530953  |              |              |
| SLDNNySTPNER                                   | CTND1_HUMAN | -0.308013285 | 0.335454299  | 5.916784998  | 5.916784998  |
| HYEDGYPGGSDNyGSLSR                             | CTND1_HUMAN | 0.629803203  | 1.064399913  |              |              |
| LNGPQDHSLLySTIPR                               | CTND1_HUMAN | -11.52583226 | -10.28860168 |              |              |
| lcEVRPcGQPvYSSLKK                              | CYR61_HUMAN | -8.788099573 | 0            |              |              |

|                                           |             |              |              |              |              |
|-------------------------------------------|-------------|--------------|--------------|--------------|--------------|
| LEAVqYKTqVVAGTnYyIK                       | CYTA_HUMAN  | -4.047238041 | 0            |              |              |
| FQDVGPQAPVGSVyQK                          | DBNL_HUMAN  | -0.958099939 | -0.962153252 |              |              |
| AGKPGLPAPDELvYQVPQSTQEVSGAGR              | DCBD2_HUMAN | -0.195556018 | 0.497751538  |              |              |
| TEGTyDLPYWDR                              | DCBD2_HUMAN | -4.716210538 | 0            |              |              |
| ATGNQPPPLVGTyNTLLSR                       | DCBD2_HUMAN | -7.237238953 | 0            |              |              |
| SDyDGIGSR                                 | DDX3X_HUMAN | 0.149526354  | 0.23023242   |              |              |
| GRSDyDGIGSR                               | DDX3X_HUMAN | 0            | -4.992461701 |              |              |
| DKDAySSFGSR                               | DDX3X_HUMAN | -5.899496644 | -6.454610203 |              |              |
| YMEySTKK                                  | DGKA_HUMAN  |              |              |              |              |
| NLNHVSyGR                                 | DHE3_HUMAN  | 0            | -4.697243698 |              |              |
| GSVADyGNLmENQDLLGSPTPPPPPHqR              | DOCK1_HUMAN | 0            | -6.747619894 | 5.629282753  | 5.629282753  |
| SHNSALySQVQK                              | DOK1_HUMAN  | 10.2983108   | 5.250049577  |              |              |
| ElySAPTGDR                                | DUOX1_HUMAN | 10.91488888  | 10.91488888  |              |              |
| NYMSNPSYnyEIVNR                           | DYHC1_HUMAN | -0.643950398 | -0.903538371 |              |              |
| IYQyIQSR                                  | DYR1A_HUMAN | 0.511575212  | 0.176733356  | 0.298592837  | 0.093280182  |
| KVYNDGYDDDNyDYIVK                         | DYR1A_HUMAN | 0.875409168  | 0.441474242  |              |              |
| VYNDGYDDDNyDYIVK                          | DYR1A_HUMAN | -0.871785344 | -1.676721118 |              |              |
| LYTyIQSR                                  | DYRK3_HUMAN | -8.829089363 | -9.316814032 |              |              |
| VEGDNIyVR                                 | E41L2_HUMAN | 0            | -4.709218316 |              |              |
| STTTGHLyK                                 | EF1A1_HUMAN | 0.63430881   | 0.362897964  | 0.185823767  | 0.01730529   |
| EHALLAyTLGVK                              | EF1A1_HUMAN | -0.758404161 | -0.94525389  | -0.094244972 | -0.528275367 |
| TADSVFcPHyEK                              | EFNB2_HUMAN | -3.390730659 | 0            |              |              |
| RPAGSVQNPVvYHNQPLNPAPSR                   | EGFR_HUMAN  | 0.510455367  | 0.925533639  | 0.457025955  | -0.305279497 |
| GSTAENAEyLR                               | EGFR_HUMAN  | 0.24048378   | 0.379318205  | 0.523284298  | -0.098062154 |
| GSHQISLDNPDyQQDFFPK                       | EGFR_HUMAN  | -0.400409394 | -0.200263233 | -0.044604956 | -0.909416963 |
| DPHYQDPHSTAVGNPEyLNTVQPTcVNSTFDSPAHWAK-17 | EGFR_HUMAN  | 2.275474202  | 0.561119167  |              |              |
| LLGAEKEyHAEGGKvPIK                        | EGFR_HUMAN  | 0.983091738  | 8.158483052  |              |              |
| DPHYQDPHSTAVGNPEyLNTVQPTcVNSTFDSPAHWAK-4  | EGFR_HUMAN  | -0.86573845  | 4.202247528  |              |              |
| MHLPSPTDSNFyR                             | EGFR_HUMAN  | -7.018120363 | -7.33095378  |              |              |
| NSESKPKEPVFSAEEGyVK                       | EMAL1_HUMAN | 0.166550546  | -0.168546914 |              |              |
| EPVFSAAEEGyVK                             | EMAL1_HUMAN | -10.10015658 | -10.35709383 |              |              |
| DVIINQEGEyIK                              | EMAL4_HUMAN | 0.549220099  | 1.093306423  | 0.303170287  | 0.093820582  |
| TADKHKDVIINQEGEyIK                        | EMAL4_HUMAN | 0.503382724  | -0.238163423 | -0.245737483 | -0.336695342 |
| HKDVIINQEGEyIK                            | EMAL4_HUMAN | 0.787139624  | 0.605124869  | 0.402890325  | 0.112335417  |
| LEWAgYR                                   | EMAL4_HUMAN |              |              | 9.322268296  | 9.322268296  |
| LKLEWAgYR                                 | EMAL4_HUMAN |              |              | 9.758266058  | 9.758266058  |
| AAVPSGASTGIyEALER                         | ENOA_HUMAN  | -2.63939567  | -3.692084832 |              |              |
| SEQLKPLKTyVDPHTYEDPNQAVLK                 | EPHA2_HUMAN | 0.540110962  | 4.015757496  |              |              |
| TYVDPHTyEDPNQAVLK                         | EPHA2_HUMAN | 1.213096975  | -0.547988027 | 3.453703069  | 3.453703069  |
| VLEDDPEATyTTSGGK                          | EPHA2_HUMAN | 0.724349882  | 0.493649536  | 0.787922331  | 0.499146043  |
| QSPEDVyFSK                                | EPHA2_HUMAN | 1.144468306  | 0.538100972  | 8.283986718  | 8.283986718  |
| ADPPyTHTIQK                               | EPS8_HUMAN  |              |              | 0            | -5.881402662 |
| VySQITVQK                                 | EPS8_HUMAN  | 6.546622024  | 6.546622024  |              |              |
| VSSTHyYLLPERPPYLDK                        | ERRFI_HUMAN | 1.432386853  | 7.149932366  |              |              |
| VSSTHyYLLPERPPYLDKYEK                     | ERRFI_HUMAN | -0.283498697 | 0.601813436  |              |              |

|                                   |             |              |              |              |              |
|-----------------------------------|-------------|--------------|--------------|--------------|--------------|
| APDFVFyAPR                        | EZRI_HUMAN  |              |              |              |              |
| SELPyEELWLEEGKPSHQPLTR            | FA59A_HUMAN | 2.579425607  | 12.02084807  | 1.210165646  | 1.15086253   |
| GSIDREDGSLQGPIGNQHlyQPVGKPDPAAPPK | FAK1_HUMAN  | -0.459487799 | -0.343099295 | -0.485166176 | -0.402860776 |
| YMEDSTyK-8                        | FAK1_HUMAN  | 2.864995461  | 2.530150507  | 0.171938297  | 0.151005302  |
| YMEDSTyK-7                        | FAK1_HUMAN  | -0.707278529 | -1.317803616 | 0.171938297  | 0.151005302  |
| YMEDSTyKASK                       | FAK1_HUMAN  | 0            | -3.326144066 | -7.317539635 | 0            |
| THAVSVSETDDyAEIIDEEDTYTMPSTR      | FAK1_HUMAN  | -8.652137924 | -10.60381244 |              |              |
| AFDTAGNGycR                       | FAS_HUMAN   |              |              |              |              |
| VQENDGKEPPPvVnyEEDAR              | FER_HUMAN   | -0.054110389 | 0.223832162  |              |              |
| QEDGGVySSSSLK                     | FER_HUMAN   | 0.71890034   | 0.83599457   |              |              |
| KDGyVLR                           | FETUB_HUMAN | 0            | -7.998712156 |              |              |
| VHSPSGALEEcyVTEIDQDKYAVR          | FLNA_HUMAN  |              |              | 7.526476938  | -0.79366595  |
| SSTETcySAIPK                      | FLNB_HUMAN  | 0.393490849  | 0.399623835  |              |              |
| HGHyFVALFDYQAR                    | FRK_HUMAN   |              |              | -0.030645208 | 0.212072387  |
| LVyENINGLSIPSASGVR                | FRS2_HUMAN  | 7.849350539  | 7.849350539  | 7.846267777  | 7.846267777  |
| KLDNGGyYITTR-7                    | FYN_HUMAN   |              |              |              |              |
| LDNGGyYITTR-6                     | FYN_HUMAN   |              |              |              |              |
| LDNGGyYITTR-7                     | FYN_HUMAN   |              |              |              |              |
| LIEDNEyTAR                        | FYN_HUMAN   | 1.688199814  | 1.65305536   | 1.243888882  | 1.696521778  |
| GAYSLIR                           | FYN_HUMAN   | 0            | -6.595632981 |              |              |
| KLDNGGyYITTR-8                    | FYN_HUMAN   | 0            | -6.889497184 |              |              |
| VGfQyEGTyK-5                      | G6PD_HUMAN  | -0.515101208 | -0.961904173 |              |              |
| VQPNEAVyTK                        | G6PD_HUMAN  | -12.39628534 | -12.83914904 | -8.958533617 | -9.262663631 |
| VGfQYEGTyK-9                      | G6PD_HUMAN  | 0.941127037  | 0.385718631  |              |              |
| RVGFQYEGTyK-10                    | G6PD_HUMAN  | 0.612403691  | 0.181563376  |              |              |
| NSYVAGQyDDAASYQR                  | G6PD_HUMAN  | 0.504150877  | -0.033056394 |              |              |
| RVGFQyEGTyK-6                     | G6PD_HUMAN  | -0.355508875 | -0.786349191 |              |              |
| SSGSGSSVADERVdyVVVDQqK            | GAB1_HUMAN  | 9.588829201  | 9.588829201  |              |              |
| VdyVVVDQqK                        | GAB1_HUMAN  | 10.2422608   | 10.2422608   |              |              |
| DASSQDcyDIPR                      | GAB1_HUMAN  | 7.886910134  | 7.886910134  |              |              |
| AGDNSQSVyIPMSPGAHHFDSLGYPSTTLPVHR | GAB2_HUMAN  | 1.045268313  | 9.798722699  |              |              |
| TDDYLDQpCyETINR                   | GDIB_HUMAN  | -7.032245961 | -7.40361297  |              |              |
| LATELyHQK                         | GFPT1_HUMAN | 0            | -6.378745614 |              |              |
| NTDYTELHQNTDLIyQTGPK              | GOGA5_HUMAN | 0            | -7.610394595 |              |              |
| VPSEGyDIIIPR                      | GPC5C_HUMAN | -0.080330504 | 1.561316753  | 1.039492285  | 0.296997079  |
| AEDMySAQSHQAATPPK                 | GPC5C_HUMAN | 5.847348245  | -0.696304304 | 6.507593202  | 0.627975896  |
| AEDMySAQSHQAATPPKDGK              | GPC5C_HUMAN | 0.150096665  | 0.501769901  | 6.515646586  | 0.438319441  |
| GVGyETILK                         | GPC5C_HUMAN | -6.828866009 | -6.239019784 |              |              |
| ALyNIGNVYHAK                      | GPSM1_HUMAN | 8.51904736   | 1.107347573  |              |              |
| NEEENIySVPHDSTQqK                 | GRLF1_HUMAN | 0.676278534  | 0.685810353  | 0.70819401   | 0.449956568  |
| SVSSSPWLPQDGFDPsDyAEPMDAVVKPR     | GRLF1_HUMAN | -8.342862899 | -6.804586068 | -8.661985676 | -8.924104619 |
| TymMmFR                           | GRM1B_HUMAN | -3.189310631 | 0            |              |              |
| SRGDNVYVVTEVLQTQK                 | GSDMD_HUMAN |              |              | 8.282774741  | 8.282774741  |
| GEPNVsYlcSR                       | GSK3B_HUMAN | 0.428988189  | 0.047935746  | 0.05840588   | -0.308237327 |
| QEPSEyQDK                         | HFM1_HUMAN  | 7.760078533  | 7.760078533  |              |              |

|                                  |             |              |              |              |              |
|----------------------------------|-------------|--------------|--------------|--------------|--------------|
| AVcSTyLQSR                       | HIPK2_HUMAN | 0.520055517  | 0.085394567  | 0.139027907  | -0.02254731  |
| TVcSTyLQSR                       | HIPK3_HUMAN | 10.39592486  | 0.352056036  | -0.018309695 | -0.180198707 |
| DGMDNQGGyGSVGR                   | HNRH3_HUMAN | 7.692690893  | 4.843191648  |              |              |
| FMSVQRPGPyDRPGTAR                | HNRPF_HUMAN | -7.72181523  | 0            |              |              |
| GGNRFEPyANPTKR                   | HNRPM_HUMAN | 0            | -6.036809907 |              |              |
| LVTSPccIVTSTyGWTANMER            | HS90A_HUMAN | 0            | -7.488715206 |              |              |
| HlyYITGETK                       | HS90A_HUMAN |              |              |              |              |
| SlyYITGESK                       | HS90B_HUMAN |              |              |              |              |
| LVSSPccIVTSTyGWTANMER            | HS90B_HUMAN | 2.349730628  | -0.310259885 |              |              |
| LKKEDlyAVEIVGGATR                | HSP74_HUMAN | 0            | -6.893865857 |              |              |
| AySSFGGGR                        | IF4H_HUMAN  | 0            | -3.562586884 |              |              |
| KGSGDyMPMSPK                     | IRS1_HUMAN  | 3.934561092  | 3.69235061   |              |              |
| LEyYENEKK-4                      | IRS1_HUMAN  | 0.691941326  | 0.454704826  | -6.145589067 | 0            |
| LEyYENEKK-3                      | IRS1_HUMAN  | 0.791074258  | 0.332596065  | 2.091097814  | 0.187045598  |
| LEyYENEK-3                       | IRS1_HUMAN  | 1.073340921  | 0.672963218  | 6.699797277  | 0.579958383  |
| LEyYENEK-4                       | IRS1_HUMAN  |              |              | 6.699797277  | 0.579958383  |
| EEETGTEEyMK                      | IRS1_HUMAN  | 9.15033827   | 9.15033827   |              |              |
| GDyMTMQMScPR                     | IRS1_HUMAN  | 6.710062428  | 6.710062428  |              |              |
| GGHHRPDSSTLHTDDGyMPMSPGVAPVPSGR  | IRS1_HUMAN  | -0.176817067 | 10.11900733  |              |              |
| QRPVQPSSASLDEyTLMR               | IRS2_HUMAN  | 8.944804871  | 8.944804871  |              |              |
| SDDyMPMSPASVSAPK                 | IRS2_HUMAN  | 5.015117193  | 1.456468818  |              |              |
| APYTcGGDSDQyVLMSSPVGR            | IRS2_HUMAN  | 9.894209036  | 9.894209036  |              |              |
| ASSPAESSPEDSGyMR                 | IRS2_HUMAN  | 3.579110975  | 2.661095047  |              |              |
| SSSSNLGADDGyMPMTPGAALAGSGSGScR   | IRS2_HUMAN  | 8.691303295  | 0.557579673  |              |              |
| LEyYESEKK                        | IRS2_HUMAN  | -7.888224473 | -8.385299688 | 0            | -5.943703854 |
| LEyYESEK                         | IRS2_HUMAN  | 1.059366066  | 0.993633795  |              |              |
| GPGAGGDEATAGGGSAPQPPRLEyESEK-25  | IRS2_HUMAN  | 0            | -5.413701014 |              |              |
| GPGAGGDEATAGGGSAPQPPRLEyYESEKK   | IRS2_HUMAN  | 0            | -7.862527175 |              |              |
| GPGAGGDEATAGGGSAPQPPRLEyYESEK-24 | IRS2_HUMAN  | -6.208461659 | -5.555353642 |              |              |
| WDTGENPIyK                       | ITB1_HUMAN  | 0.610040922  | 0.457293137  |              |              |
| WDTAnNPLyK                       | ITB3_HUMAN  | 0.610040922  | 0.457293137  |              |              |
| VcAYGAQGEGPySSLVScR              | ITB4_HUMAN  | -8.160703694 | -8.400523094 |              |              |
| LlyLVPEK                         | ITSN2_HUMAN |              |              | 7.020766435  | 7.020766435  |
| REEPEALyAAVnk                    | ITSN2_HUMAN | 1.013569467  | 0.955649209  |              |              |
| REVGDyGQLHETEVLK                 | JAK2_HUMAN  | 0            | -7.730098493 |              |              |
| VlySQPSAR                        | JAM1_HUMAN  | -0.46722275  | -0.869557692 |              |              |
| KVlySQPSAR                       | JAM1_HUMAN  | 0            | -7.182285023 |              |              |
| SLyNLGGSKR                       | K2C5_HUMAN  |              |              |              |              |
| SAyGGPVGAGIR                     | K2C7_HUMAN  |              |              |              |              |
| LSSARPGGLGSSSLyGLGASRPR          | K2C7_HUMAN  | -8.077551503 | -7.94667673  | 0.185688831  | -0.135071823 |
| DVDAAyMSK                        | K2C7_HUMAN  | 0            | -2.891454124 |              |              |
| FSYTSQHSDyGQR                    | KIRR1_HUMAN | 1.510873731  | 7.366662259  |              |              |
| EEYEMKDPTNGyYNVR                 | KIRR1_HUMAN | 0.597208282  | 1.310916783  |              |              |
| AVLyADYR                         | KIRR1_HUMAN | -0.228098013 | 9.415582766  |              |              |
| LSHSSGyAQLNTYSR-7                | KIRR1_HUMAN | -0.360231937 | 0.238783904  |              |              |

|                                              |             |              |              |              |              |
|----------------------------------------------|-------------|--------------|--------------|--------------|--------------|
| AlySSFKDDVDLK                                | KIRR1_HUMAN | -1.774789119 | -1.04165094  |              |              |
| LSHSSGYAQLNTySR-13                           | KIRR1_HUMAN | -3.260695999 | -4.348769255 |              |              |
| FNSHPFPGAAGyPTyR                             | KIRR1_HUMAN | -3.544044542 | 0            |              |              |
| RSDSASSEPVGIyQGFEK                           | KPCD_HUMAN  | 10.49528707  | 2.295330359  |              |              |
| SDSASSEPVGIyQGFEK                            | KPCD_HUMAN  | 1.742678585  | 1.008393891  |              |              |
| KTGVAGEDMQDNSGTyGK                           | KPCD_HUMAN  | 5.189808903  | 5.189808903  |              |              |
| TGVAGEDMQDNSGTyGK                            | KPCD_HUMAN  | 1.771081964  | 1.446551244  |              |              |
| TATESFASDPILyRPVAVALDTK                      | KPYM_HUMAN  |              |              | -0.127932054 | -0.439535098 |
| EAEAAIyHLQLFEELRR                            | KPYM_HUMAN  | 0            | -6.621553129 |              |              |
| AQIPEGDyLSyR                                 | LAP2_HUMAN  |              |              |              |              |
| IyDILSDNGPQQPSTTVK                           | LAP2_HUMAN  | -0.403558231 | 1.435884797  |              |              |
| NLDNGGFyISPR                                 | LCK_HUMAN   |              |              | 0.667923373  | -0.355526989 |
| QVVESAyEVIK                                  | LDHA_HUMAN  | 1.165489139  | 0.421259866  | 0.196431165  | 0.092281076  |
| DQLIyNLLKEEQTPQNK                            | LDHA_HUMAN  | -6.851497563 | -6.338647312 |              |              |
| MVVESAyEVIK                                  | LDHB_HUMAN  | -0.754883629 | -0.132776684 | 0.105457139  | -0.151182293 |
| TTEDEVHicHNQDGySYPSR-15                      | LDLR_HUMAN  | -0.576545335 | 0.228029944  |              |              |
| TTEDEVHicHNQDGySYPSR-17                      | LDLR_HUMAN  | -7.637838716 | 0            |              |              |
| NmDDyEDFDEK                                  | LMBD2_HUMAN | 5.586726024  | 5.586726024  |              |              |
| NHQLYcNDcyLR                                 | LMO7_HUMAN  | -7.369380455 | -7.592317357 |              |              |
| NDSDPtyGQQGHPNTWK                            | LPP_HUMAN   | 1.134263855  | 0.948585713  |              |              |
| SAQSPHYMAAPSSGQIyGSGPQGYNTQPVPVSGQcPPPSTR-18 | LPP_HUMAN   | -3.495198532 | -3.203246709 |              |              |
| SAQSPHYMAAPSSGQIyGSGPQGYNTQPVPVSGQcPPPSTR-25 | LPP_HUMAN   | -5.144623959 | 0            |              |              |
| SAQSPHYMAAPSSGQIyGSGPQGYNTQPVPVSGQcPPPSTR-8  | LPP_HUMAN   | -7.655067005 | 0            |              |              |
| SSSAGGQGSyVPLLR                              | LSR_HUMAN   | -8.00946321  | -7.473528357 |              |              |
| VIEDNEyTAR                                   | LYN_HUMAN   | 0.598716375  | 0.611509459  | 1.918734287  | 1.691727049  |
| SLDNGGyYISPR-7                               | LYN_HUMAN   | 0.284516502  | -0.087485777 |              |              |
| SLDNGGyYISPR-8                               | LYN_HUMAN   | 0.284516502  | -0.087485777 |              |              |
| VENcPDELyDIMK                                | LYN_HUMAN   | 0.458406263  | -2.094778446 |              |              |
| TPDTSTYcyETAEK                               | MAP1B_HUMAN | 0            | -5.048218557 |              |              |
| AAEAGGAEEQyGFLTTPTK                          | MAP1B_HUMAN | -1.532436535 | -1.326574993 |              |              |
| TSDVGGYyEK-9                                 | MAP1B_HUMAN | -4.967757011 | -5.923492342 |              |              |
| TSDVGGyYyEK-7                                | MAP1B_HUMAN | -4.967757011 | -5.923492342 |              |              |
| TSDVGGyYyEK-8                                | MAP1B_HUMAN | -4.967757011 | -5.923492342 |              |              |
| DMYDKEyYSVHNK-7                              | MET_HUMAN   | -0.50125845  | 10.72270418  |              |              |
| DmyDKEYYSVHNK-3                              | MET_HUMAN   | -8.343068487 | 0            |              |              |
| yWKPTGTPK                                    | MGLL_HUMAN  | 7.231121917  | 2.033924394  |              |              |
| VADPDHDHTGFLTEyVATR                          | MK01_HUMAN  | 2.430534071  | 1.749655225  | 4.40303971   | 3.589873135  |
| IADPEHDHTGFLTEyVATR                          | MK03_HUMAN  | 2.041210957  | 1.890153039  | 9.400194047  | 9.400194047  |
| GLcTSPAEHQYFMTEyVATR                         | MK07_HUMAN  | 0            | -8.700623137 |              |              |
| TAGTSFMMPyVVTR                               | MK08_HUMAN  | 0            | -7.852881309 |              |              |
| TAcTNFMMPyVVTR                               | MK09_HUMAN  | 0.86282809   | 2.242665225  | 0            | -8.565402751 |
| QADSEMTGyVVTR                                | MK12_HUMAN  | 0.428281197  | 1.46843141   |              |              |
| HADAEmTGyVVTR                                | MK13_HUMAN  |              |              |              |              |
| HTDDEMTGyVATR                                | MK14_HUMAN  | 1.004587636  | 0.82936758   | 8.102830484  | 8.102830484  |
| SLPSGSHQGPVlyAQLDHSGGHSDK                    | MPZL1_HUMAN | 1.509407288  | 0.14672114   | 12.03053111  | 12.03053111  |

|                                      |             |              |              |              |              |
|--------------------------------------|-------------|--------------|--------------|--------------|--------------|
| SESVVyADIR                           | MPZL1_HUMAN | -0.481359099 | -1.151243131 |              |              |
| DTYHPMSEYPTYHTHGR-12                 | MUC1_HUMAN  | 1.153726553  | 1.486637966  |              |              |
| YVPPSSTRSPyEK                        | MUC1_HUMAN  | 0.742076928  | 1.021428994  |              |              |
| DTYHPMSEyPTYHTHGR-9                  | MUC1_HUMAN  | 0.651746547  | 1.259387608  |              |              |
| DTyHPMSEYPTYHTHGR-3                  | MUC1_HUMAN  | 0.397294142  | 1.154745974  |              |              |
| VSAGNGGSSLSyTNPAAVATSANL             | MUC1_HUMAN  | 0            | -7.68222088  |              |              |
| IPPyHYIHVLDQNSNVSR-4                 | MVP_HUMAN   |              |              | 0.372185184  | -0.20999021  |
| IPPYHyIHVLDQNSNVSR-6                 | MVP_HUMAN   |              |              | 8.141349509  | -0.20999021  |
| VAAYDKLEK                            | MYH9_HUMAN  | 0            | -6.936553086 | 6.724376388  | 6.724376388  |
| YLLETSGNLDGLEyK                      | NAMPT_HUMAN | 0            | -4.790001324 |              |              |
| LyDLNMPAYVK                          | NCK1_HUMAN  | 1.942341709  | 1.271149529  | 7.530124087  | 7.530124087  |
| RKPSVPDSASPADD SFVDPGERLyDLNMPAYVK   | NCK1_HUMAN  | 0            | -7.551247332 |              |              |
| RPLHPALNQPGGLQPLSFQNPVvHLNNPIAMPK    | NGAP_HUMAN  | 1.491866419  | 1.093434585  |              |              |
| TSFNyAMK                             | NQO1_HUMAN  | 0            | -8.024281361 |              |              |
| DKLNTQSTySEA                         | NRP1_HUMAN  | -0.079303401 | 0.239076791  | 0            | -5.733492762 |
| TLHyEciVLVK                          | NUDT5_HUMAN |              |              | -0.170586756 | -0.489071579 |
| FNqKGEVYK                            | ODB2_HUMAN  | 0            | -11.55291992 |              |              |
| LyEEYTR                              | P55G_HUMAN  | 0            | -3.898123156 |              |              |
| SKEYDRLyEEYTR                        | P55G_HUMAN  | 0            | -7.057120664 |              |              |
| TRDQyLMWLTQK                         | P85A_HUMAN  | -6.626650716 | -3.730019511 |              |              |
| SREYDQLyEEYTR                        | P85B_HUMAN  | 0.91403529   | 0.091398626  |              |              |
| EYDQLyEEYTR                          | P85B_HUMAN  | 0.695755985  | 0.000654284  |              |              |
| NETEDQyALMEDEDDLPHHEER               | P85B_HUMAN  | -9.674428573 | -8.199596712 |              |              |
| SPSScNDLyATVK                        | PAG1_HUMAN  | 7.673074298  | 0.480394147  |              |              |
| ENDyESISDLQQGR                       | PAG1_HUMAN  | 0.977721277  | 0.703345513  |              |              |
| SGQSLTVPESTyTSIQGDPQR                | PAG1_HUMAN  | -5.800007482 | -7.779984769 |              |              |
| SVDGDQGLGMEGPyEVLK                   | PAG1_HUMAN  | -7.55539386  | -6.966181188 |              |              |
| SREEDPTLTEEEISAMySSVKNKPGQLVNK       | PAG1_HUMAN  | -8.776614787 | -6.356215689 |              |              |
| SSFShySGLK                           | PAIRB_HUMAN | -6.752149337 | -6.127421646 |              |              |
| VGEEEHVvSFPNK                        | PAXI_HUMAN  | 0.496548202  | 0.381259869  | -0.122902145 | -0.377915758 |
| FIHQPPQSSSPVvGSSAK                   | PAXI_HUMAN  | 0.18533264   | 0.425759213  | 0.161108554  | -0.023018217 |
| LDnmLLAEGVSGPEKGGGSAASGGSSDNSIEHSDyR | PBX3_HUMAN  | 0            | -6.388731377 |              |              |
| EPSAPSIPTPayQSSPAGGHAPTPPTPAPR       | PDC6I_HUMAN | -9.771595092 | -9.512553667 | -7.863399641 | -8.724385376 |
| ALNGAEPNyHSLPSAR                     | PDRO_HUMAN  | -6.927303227 | -7.393293938 |              |              |
| VPIVINPNayDNLAIyK-10                 | PEAK1_HUMAN | -1.516454162 | -1.290756591 | 0.072160629  | 7.262985714  |
| VPIVINPNAYDNLAIyK-16                 | PEAK1_HUMAN |              |              | 0.072160629  | 7.262985714  |
| ASTDVAGQAVTINLVPTTEEQAKPyR           | PEAK1_HUMAN | 8.478160819  | 8.478160819  |              |              |
| EDGKEDISDPMDPNPcSATySNLGGQR          | PEAK1_HUMAN | -8.249567491 | -7.970674312 |              |              |
| ATFHTPFSHLGQSPeGcSSyTFPK             | PECI_HUMAN  | -0.013146382 | 0.189969953  |              |              |
| FSGWyDADLSPAGHEEAKR                  | PGAM1_HUMAN |              |              |              |              |
| HyGGLTGLNK                           | PGAM1_HUMAN | 0            | -8.900172419 |              |              |
| LSPGESAyQK                           | PHTNS_HUMAN | 7.498491268  | 0.082314288  |              |              |
| FKEycPMVFR                           | PI42A_HUMAN | 0            | -7.843887672 |              |              |
| FGyHIIMVEGR                          | PIN4_HUMAN  | 0            | -6.952727071 |              |              |
| SEDIyADPAAYVmR                       | PKHA6_HUMAN | -4.421489361 | -6.879030905 |              |              |

|                                        |             |              |              |              |              |
|----------------------------------------|-------------|--------------|--------------|--------------|--------------|
| AGTTATyEGR                             | PKP2_HUMAN  |              |              |              |              |
| NLIyDNADNK                             | PKP3_HUMAN  |              |              |              |              |
| NNYALNTTATyAEPYRPIQYR                  | PKP4_HUMAN  | -8.810084226 | 0            |              |              |
| LNyGIPAIVK                             | PLAK_HUMAN  |              |              | 1.110827613  | -0.191513289 |
| AVTGYKDPySGK                           | PLEC_HUMAN  |              |              | 5.488867387  | 5.488867387  |
| GYYSpySVSGSGSTAGSR                     | PLEC_HUMAN  | 0.412623785  | -0.102939559 |              |              |
| cccllyEKPR                             | PP1RB_HUMAN | 0.073791965  | 0.083238892  |              |              |
| cyEMASHLR                              | PROF1_HUMAN |              |              |              |              |
| LcDFGSASHVADNDITPyLVSR                 | PRP4B_HUMAN | 0.546362243  | -0.726694879 | -0.162394658 | -0.754806341 |
| HIGLVySGMGPDYR                         | PSA2_HUMAN  | -6.325107155 | -5.773752222 |              |              |
| KGPGLyYVDEHGTR                         | PSB8_HUMAN  | 0            | -6.99601711  |              |              |
| GQPlyIQFSNHK                           | PTBP1_HUMAN | -7.75891605  | -8.360304137 |              |              |
| IQNTGDyYDLYGGEK-7                      | PTN11_HUMAN | 1.171353714  | 0.228770298  | 8.039702623  | 8.039702623  |
| IQNTGDYyDLYGGEK-8                      | PTN11_HUMAN | 1.171353714  | 0.228770298  | 8.039702623  | 8.039702623  |
| IQNTGDYyDLYGGEK-11                     | PTN11_HUMAN |              |              | 8.039702623  | 8.039702623  |
| VyENVGLMQQQK                           | PTN11_HUMAN | 3.116138233  | 2.300745902  |              |              |
| GQSEyGNITYPPAMK                        | PTN6_HUMAN  | -5.655349056 | -3.563124374 |              |              |
| VVQEYIDAFSDyANFK                       | PTPRA_HUMAN | 0.727976752  | -0.735594345 | -0.555012474 | 7.464228205  |
| VVQDFIDIFSDyANFK                       | PTPRE_HUMAN |              |              | 5.964392134  | 5.964392134  |
| VMlyQDEVK                              | PTRF_HUMAN  |              |              |              |              |
| SFTPDHVvyAR                            | PTRF_HUMAN  | 1.214211117  | 1.06806252   |              |              |
| VMlyQDEVKLPK                           | PTRF_HUMAN  |              |              |              |              |
| KSFTPDHVvyAR                           | PTRF_HUMAN  | -9.867120425 | 0            |              |              |
| YGLFKEENPyAR                           | PTTG_HUMAN  | -7.608227865 | 0            |              |              |
| VVAcNLyPFVK                            | PUR9_HUMAN  | -7.335788102 | -7.758722886 | -0.19581232  | -0.723768469 |
| ARPEyMLPVHFYGR                         | PYGB_HUMAN  |              |              | 0            | -8.524694344 |
| AHAWPSPyKDYEVK                         | RAI3_HUMAN  |              |              | 9.490311539  | 9.490311539  |
| AYSQEEITqGFEETGDTLyAPYSTHFQLQNQPPQK-19 | RAI3_HUMAN  |              |              | 5.942634725  | 5.942634725  |
| AYSQEEITQGFEETGDTLYAPySTHFQLQnQPPQK-22 | RAI3_HUMAN  |              |              | 5.942634725  | 5.942634725  |
| AHAWPSPyKDYEVKK                        | RAI3_HUMAN  |              |              | 11.30122361  | 0.853996041  |
| NLQyYDISAK-4                           | RAN_HUMAN   |              |              | 0            | -8.630639379 |
| NLQYyDISAK-5                           | RAN_HUMAN   | 0            | -6.794337921 | 0.043525784  | -0.188468513 |
| SNyNFEKPFLLAR                          | RAN_HUMAN   |              |              | 1.815541475  | 1.309854036  |
| HFTNPycNIYLNsvQVAK                     | RASA1_HUMAN | 0.15831618   | -0.144128687 | 0.214445569  | -0.474229323 |
| ASyVAPLTAQPATYR                        | RBM14_HUMAN |              |              |              |              |
| MQAYSNPgySSFPSTGLEPScK                 | RFFL_HUMAN  | -7.290129436 | -7.451653591 |              |              |
| EKPAQDPLyDVPNASGGQAGGPRPGR             | RIN1_HUMAN  | 0.825513171  | 1.64542798   | 0.706403157  | 0.134376668  |
| IQLLDDyPK                              | RLA0_HUMAN  | 0.202540112  | -0.052520716 | 0.0358663    | -0.621892047 |
| AVPKEDySGGGGGGSR                       | ROA0_HUMAN  | 0.892558512  | 0.697164042  |              |              |
| EDySGGGGGGSR                           | ROA0_HUMAN  | 0.386315747  | 0.552091863  |              |              |
| SSGPYGGGGQyFAKPR-11                    | ROA1_HUMAN  | 0.450281446  | 0.40233303   |              |              |
| SSGPYGGGGQYFAKPR-5                     | ROA1_HUMAN  | 1.691655161  | 1.072436008  |              |              |
| NQGGYGGSSSSSSyGSGR-14                  | ROA1_HUMAN  | -0.183303647 | 0.175250818  |              |              |
| NQGGyGGSSSSSSyGSGR-5                   | ROA1_HUMAN  | -0.63727579  | -0.542500974 |              |              |
| NMGGPyGGGNYGPGSGGSGGYGGR-6             | ROA2_HUMAN  | 0.936037546  | 0.261464111  |              |              |



|                                   |                                     |              |              |              |              |
|-----------------------------------|-------------------------------------|--------------|--------------|--------------|--------------|
| NMGGPYGGGNYGPGGSGGSGGyGGR-22      | ROA2_HUMAN                          | 0.605281606  | 0.717412902  |              |              |
| NMGGPYGGGNYGPGGSGGSGGyGGR-11      | ROA2_HUMAN                          | -0.367758899 | -0.482774335 |              |              |
| SSGSPyGGGYGSGGGSGGyGSR-6          | ROA3_HUMAN                          | 1.406058444  | -0.038254307 |              |              |
| SSGSPYGGGYGSGGGSGGyGSR-19         | ROA3_HUMAN                          | 0.421720549  | 0.171932147  |              |              |
| SSGSPYGGGyGSGGGSGGyGSR-10         | ROA3_HUMAN                          | 0            | -6.633582564 |              |              |
| NGLTSTyAGIR                       | ROBO1_HUMAN                         | 0            | -4.846393569 |              |              |
| IAIyELLFK                         | RS10_HUMAN                          | -6.314542848 | 0            | -8.483237003 | -8.738154146 |
| LVQSPNSyFMDVK                     | RS27_HUMAN                          | 0.276863866  | 0.424545869  | 7.018628628  | -0.31817759  |
| ADHQPLTEASyVNLPTIALcNTDSPLR       | RSSA_HUMAN                          | -5.749005678 | -6.857360973 |              |              |
| EFEVyGPIKR                        | RU17_HUMAN                          | 6.315387916  | -2.055867168 |              |              |
| FAGDKGyLTK                        | S10AA_HUMAN                         | -4.613658355 | -4.613577602 |              |              |
| SHyADVDPENQNFLLESNLGK             | S38A2_HUMAN                         |              |              |              |              |
| QmAyENLnDK                        | SCG2_HUMAN                          | 5.097935066  | 5.097935066  |              |              |
| VIQAQTAFSANPANPAILSEASAPIHDGNLyPR | SDCB1_HUMAN                         | -6.116242182 | -6.443601074 | -0.038445329 | -0.26131802  |
| QQPTQFINPETPGyVGFANLPNQVHR        | SEPT2_HUMAN                         | 0.485555864  | 0.464100016  |              |              |
| NQDATVyVGGLDEK                    | SF3B4_HUMAN                         | 0            | -6.692399779 |              |              |
| EATQPEIyAESTK                     | SG223_HUMAN                         | 0.179465641  | 0.173217608  | -0.069258643 | -0.253038703 |
| EATQPEIyAESTKR                    | SG223_HUMAN                         | 10.04306915  | 0.275634177  | -0.273611036 | -0.381303313 |
| AGKGESAGyMEPYEAQR                 | SHB_HUMAN                           | 3.958040214  | 3.958040214  |              |              |
| GESAGyMEPYEAQR                    | SHB_HUMAN                           | 0.125348887  | 2.151883669  |              |              |
| VTIADDySDPFDAK                    | SHB_HUMAN                           | -6.969063912 | -5.368815852 |              |              |
| DKVTIADDySDPFDAK                  | SHB_HUMAN                           | -7.366968878 | -5.793757121 |              |              |
| ELFDDPSyVNVQNLDK                  | SHC1_HUMAN                          | 1.427467166  | 1.546842182  | 1.841576929  | 1.801339667  |
| MAGFDGSAWDEEEEEPPDHQYyNDFPGK      | SHC1_HUMAN                          | 0            | -5.649729871 |              |              |
| APPcSGSSITEIINPNyMGVGPFGPPMPLHVK  | SHIP1_HUMAN                         | 3.986018279  | 3.986018279  |              |              |
| NSFNNPAYyVLEGVPHQLLPPEPPSPAR-8    | SHIP2_HUMAN                         | 5.677892677  | 7.780134346  | 4.361323377  | 0.985713003  |
| NSFNNPAYyVLEGVPHQLLPPEPPSPAR-9    | SHIP2_HUMAN                         |              |              | 4.361323377  | 0.985713003  |
| TLSEVDyAPAGPAR                    | SHIP2_HUMAN                         | 7.269453674  | 7.269453674  |              |              |
| LGQDPyR                           | SON_HUMAN                           | 0            | -4.165679466 |              |              |
| EDLELYyKK                         | SPAT1_HUMAN                         | -9.862304965 | 0            |              |              |
| ALSSEGKPyVTKEELYQNLTR             | SPTA2_HUMAN                         | 0            | -5.959573616 |              |              |
| cSVcPDyDLcSVcEGK                  | SQSTM_HUMAN                         | 2.402568125  | 1.930439378  |              |              |
| LPSSPVyEDAASFK                    | SRC8_HUMAN                          | -0.394169872 | 0.324421464  | 1.201578705  | 8.385094417  |
| TQTPPVSPAPQPTTEERLPSSPVyEDAASFK   | SRC8_HUMAN                          | -1.355332174 | -1.082415498 |              |              |
| GPVSGTEPEPVySMEAADYR              | SRC8_HUMAN                          | -1.966442085 | -0.899721807 |              |              |
| SHEGETAyIR                        | SRSF1_HUMAN                         | 1.575511779  | 6.396591187  | 0            | -5.476605395 |
| YcRPESQEHPEADPGSAAPyLK            | STAT3_HUMAN                         | 3.503882973  | 2.950444426  | 0.985061505  | 1.008133972  |
| GASQAGMTGyGMPR                    | TAGL2_HUMAN                         | -0.525203724 | -0.33961027  |              |              |
| IHFPLATyAPVISAEK                  | TBA1A_HUMAN;TBA1B_HUMAN;TBA1C_HUMAN | -0.408782724 | -0.780699178 |              |              |
| VGINyQPPTVVPGGDLAK                | TBA1A_HUMAN;TBA1B_HUMAN;TBA1C_HUMAN | -6.052781629 | -6.877886617 |              |              |
| QLFHPEQLITGKEDAANNyAR             | TBA1C_HUMAN;TBA4A_HUMAN             |              |              |              |              |
| LGEyEDVSR                         | TBCB_HUMAN                          | 1.184576706  | 1.49226466   |              |              |
| LSLGQyDNDAGGQLPFSK                | TENS3_HUMAN                         | 1.38360526   | 0.598153685  | 0.152384565  | 0.111447588  |
| ESMcSTPAFPVSPETPyVK               | TENS3_HUMAN                         | 1.231516023  | 0.399095589  | -6.986569823 | 0            |
| KLSLGQyDNDAGGQLPFSK               | TENS3_HUMAN                         | 9.803447521  | 0.390945363  | 0.246000816  | 0.595372195  |

|                                               |             |              |              |              |              |
|-----------------------------------------------|-------------|--------------|--------------|--------------|--------------|
| QQQMVAHQySFAPDGEAR                            | TENS3_HUMAN | 0.753080021  | 0.466244696  |              |              |
| SAFSNLFGGEPLSyTR                              | TFR1_HUMAN  | -6.266613951 | 0            |              |              |
| SEGTyccGPVPVR                                 | TGM2_HUMAN  | 0            | -5.728206073 |              |              |
| MIMDTAGNDPycFVEFHEHR                          | TIA1_HUMAN  | 0            | -7.077301356 |              |              |
| MITEHTSNDPycFVEFYEHR                          | TIAR_HUMAN  | 0            | -7.000419715 |              |              |
| yyGAVGSTLR                                    | TITIN_HUMAN |              |              |              |              |
| NmAEQIIQElySQQSK                              | TKT_HUMAN   | 0            | -4.214159594 |              |              |
| ALDyYMLR-4                                    | TLN1_HUMAN  | -6.200741821 | -5.142970014 | 0.028178365  | -0.314322633 |
| TMQFEPSTMVyDAcR                               | TLN1_HUMAN  | 0.322350495  | 1.939952185  | -0.324793126 | -0.655566335 |
| ALDYyMLR-5                                    | TLN1_HUMAN  |              |              | 0.028178365  | -0.314322633 |
| AVSSAIAQLLGEVAQGNENyAGIAAR                    | TLN1_HUMAN  |              |              | 4.377372038  | 4.377372038  |
| KSTVLQQQyNR                                   | TLN1_HUMAN  | 6.223612058  | -0.105145379 |              |              |
| STVLQQQyNR                                    | TLN1_HUMAN  | 0            | -3.135745449 |              |              |
| AKPEPDILEEEKIyAYPSNITSETGFR                   | TM192_HUMAN | 0            | -3.984543781 |              |              |
| KVAWDyGR                                      | TM63B_HUMAN | -5.806975601 | 0            |              |              |
| KVYyENAyGQFIGPHR                              | TRXR1_HUMAN | 0.494948361  | 0.429798592  |              |              |
| VVYyENAyGQFIGPHR                              | TRXR1_HUMAN | 0.3028796    | 0.150476847  |              |              |
| SyDYDLIIIGGGSGGLAAK                           | TRXR1_HUMAN | -6.254788061 | -4.586902353 |              |              |
| SYDYDLIIIGGGSGGLAAK                           | TRXR1_HUMAN | -6.254788061 | -4.586902353 |              |              |
| RTDAySR                                       | TSC2_HUMAN  | 0            | -5.067493385 |              |              |
| LLAQAEGEPcyIR                                 | TYK2_HUMAN  | 0.427550144  | 0.650290686  | 0.271371896  | -0.179704057 |
| NSQEAEVScPFIDNTyScSGK                         | UB7I3_HUMAN | 0            | -4.653806419 |              |              |
| IYNGDyYR-6                                    | UFO_HUMAN   | -6.571866161 | -4.028400689 |              |              |
| IYNGDYyR-7                                    | UFO_HUMAN   |              |              |              |              |
| KIYNGDYyR-8                                   | UFO_HUMAN   | -5.087437116 | 0            |              |              |
| KIYNGDYyR-7                                   | UFO_HUMAN   | -5.087437116 | -4.202602173 |              |              |
| ESSSIyISK                                     | UGDH_HUMAN  | 0.087180155  | -1.387041169 |              |              |
| IEQyATR                                       | UTRO_HUMAN  | 0            | -4.84524289  |              |              |
| VQIyHNPTANSFR                                 | VASP_HUMAN  | 7.633845494  | 0.331333511  | 0.103225577  | -0.164479678 |
| MDyVEINIDHK                                   | VIGLN_HUMAN | -9.083715404 | -8.142259027 |              |              |
| SLYASSPGGVyATR-11                             | VIME_HUMAN  | 1.172722507  | 0.939840216  | 0.879416418  | 8.930785673  |
| SLyASSPGGVYATR-3                              | VIME_HUMAN  | 0.951824117  | 0.696272775  |              |              |
| SyVTTSTR                                      | VIME_HUMAN  | 0            | -4.013020641 |              |              |
| TySLGSALRPSTSR                                | VIME_HUMAN  | 0            | -7.273970914 |              |              |
| FANyIDKVR                                     | VIME_HUMAN  | 0            | -7.393134987 |              |              |
| FANyIDK                                       | VIME_HUMAN  | -6.460876689 | -5.317123028 |              |              |
| SFLDSGyR                                      | VINC_HUMAN  | 0.006567089  | -0.001754761 | -0.134164237 | -0.404154908 |
| VlyDFIEK                                      | WASL_HUMAN  | -10.13478753 | -10.48207747 | 0.393351676  | 0.551334714  |
| AHDGGIyAISWSPDSTHLLSASGDK                     | WDR1_HUMAN  | -8.866399127 | -9.132921455 | -0.107690085 | -0.606930955 |
| AGEEHyNclSALHK                                | WRIP1_HUMAN | 0            | -6.910635107 |              |              |
| DHVVEGEPyAGYDR                                | XYLK_HUMAN  | 0            | -6.689527226 |              |              |
| GESyNcGYKPYR                                  | ZFHx2_HUMAN |              |              |              |              |
| QTPSLPEPKVyAQVGQPDVLDLPVSPSDGVLPNSTHEDGILRPSr | ZO1_HUMAN   | 0            | -2.323324016 |              |              |
| HEEQPAPGyDTHGR                                | ZO1_HUMAN   | -5.51834817  | 0            |              |              |
